# Supplementary material
Source: publisher site journal article supplement (https://www.dovepress.com/article/422944)
Supplement: Supplementary file 1 [file get_supplementary_file.php]

**Supporting Information**

**Carrier-Free Binary Self-Assembled Nanomedicines Originated from Traditional Herb Medicine with Multifunction to Accelerate MRSA-Infected Wound Healing by Antibacterial, Anti-Inflammation and Promoting Angiogenesis**

**Jihui Lu1, Zhijia Wang1, Desheng Cai1, Xiaoyu Lin1, Xuemei Huang1, Zhihua Yuan1, Yaozhi Zhang1, Haimin Lei1*, Penglong Wang1***

*School of Chinese Pharmacy, Beijing University of Chinese Medicine, Beijing 102488, China*

* Correspondence: Penglong Wang, School of Chinese Pharmacy, Beijing University of Chinese Medicine, Beijing 102488, China, E-mail addresses: [wpl581@126.com](mailto:wpl581@126.com). Haimin Lei, School of Chinese Pharmacy, Beijing University of Chinese Medicine, Beijing 102488, China, E-mail addresses: [hm_lei@126.com](mailto:hm_lei@126.com).

Proton Nuclear Magnetic Resonance Spectroscopy of 1H-NMR

1H-NMR spectra were recorded on an Avance IIIHD 400 MHz spectrometer (Bruker, America) with tetramethylsilane as an internal standard

GA: 1H-NMR (400 MHz, DMSO-*d*6, *δ*): 12.21 (s, 1H, 1-COOH), 9.17 (s, 2H, 3-H, 5-H), 8.82 (s, H, 3-H), 6.92 (s, 2H, 2-H, 6-H).

BBR: 1H-NMR (400 MHz, DMSO-*d*6, *δ*): 9.91 (s, 1H, 8-H), 8.97 (s, 1H, 13-H), 8.19 (d, *J* = 9.2 Hz, 1H, 11-H), 8.01 (d, *J* = 8.0 Hz, 1H, 12-H), 7.79 (s, 1H, 1-H), 7.08 (s, 1H, 4-H), 6.18 (s, 2H, 15-CH2), 4.95 (t, *J* = 6.0 Hz, 2H, 6-CH2), 4.10 (s, 3H, 9-OCH3), 4.07 (s, 3H, 10-OCH3), 3.21 (t, *J* = 6.0 Hz, 2H, 5-CH2).

GA-BBR NPs: 1H-NMR (400 MHz, DMSO-*d*6, *δ*): 9.88 (s, 1H, 8-H, BBR), 8.91 (s, 1H, 13-H, BBR), 8.18 (d, *J* = 9.2 Hz, 1H, 11-H, BBR), 7.98 (d, *J* = 8.0 Hz, 1H, 12-H, BBR), 7.78 (s, 1H, 1-H, BBR), 7.08 (s, 1H, 4-H, BBR), 6.84 (s, 4H, 2-H, 6-H, GA), 6.17 (s, 2H, 15-CH2, BBR), 4.95 (t, *J* = 6.0 Hz, 2H, 6-CH2, BBR), 4.10 (s, 3H, 9-OCH3, BBR), 4.07 (s, 3H, 10-OCH3, BBR), 3.21 (t, *J* = 6.0 Hz, 2H, 5-CH2, BBR).

**Table S1.** Primers used in this study.

| Gene | Forward Primer (5′-->3′) | Reverse primer (5′-->3′) |
| --- | --- | --- |
| rpsF | ACGCCCAAACATTGAGGAAG | CGTTGGAATTCGTCAGTAGCT |
| rplC | CTTTTGTAGCTGGCGACGTT | TGTTTCCACCCATACGTCCT |
| rplN | CAACTCTGGTGCTCGTGAAG | GTGGGCCTTTGTCATCACG |
| rplX, | TCGCAGGTAAAGACAAAGGT | CATGGATTGCTGCCTCTGTT |
| rpsC | AAACCGTGCTTCATTCCGTC | ATCGATGTCAGCACGTAACG |
| rpmC | ATGAAAGCTAAGGAAATTAG | TTTCATTCCGATTAGTTATT |
| rpsH | CGTGTTTATGCAAAAGCTAGCG | TGCGATAATTTCTCCACCAACA |

**Table S2. Self-assembly occurs. √: Occurs ×: No occurs**

| Compound | Gallic acid | 3-Hydroxybenzoic acid | 4-Hydroxybenzoic acid | 3,5-Dihydroxybenzoic acid | Pyrogallol |
| --- | --- | --- | --- | --- | --- |
| Structure |  |  |  |  |  |
| Self-assembly occurs | **√** | **×** | **×** | **×** | **×** |

**
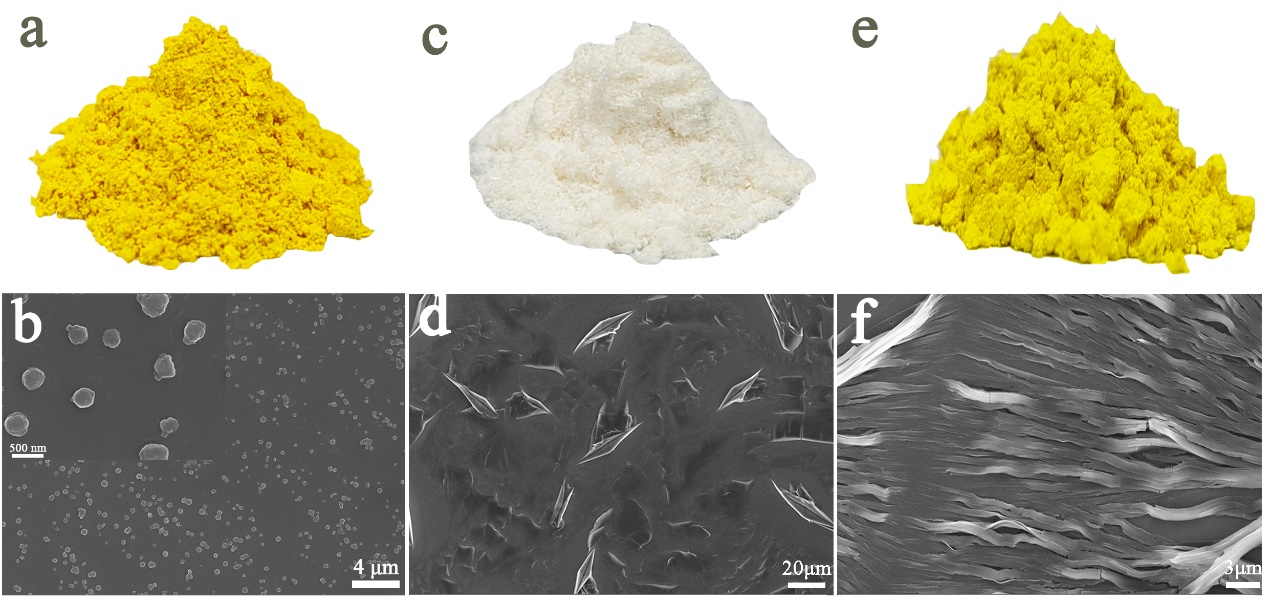
**

**Figure S1.** The morphology of monomers. (a) Powder of GA-BBR NPs. (b) FESEM image of GA-BBR NPs. (c) Monomer powder of GA. (d) FESEM image of GA. (e) Monomer powder of BBR. (f) FESEM image of BBR


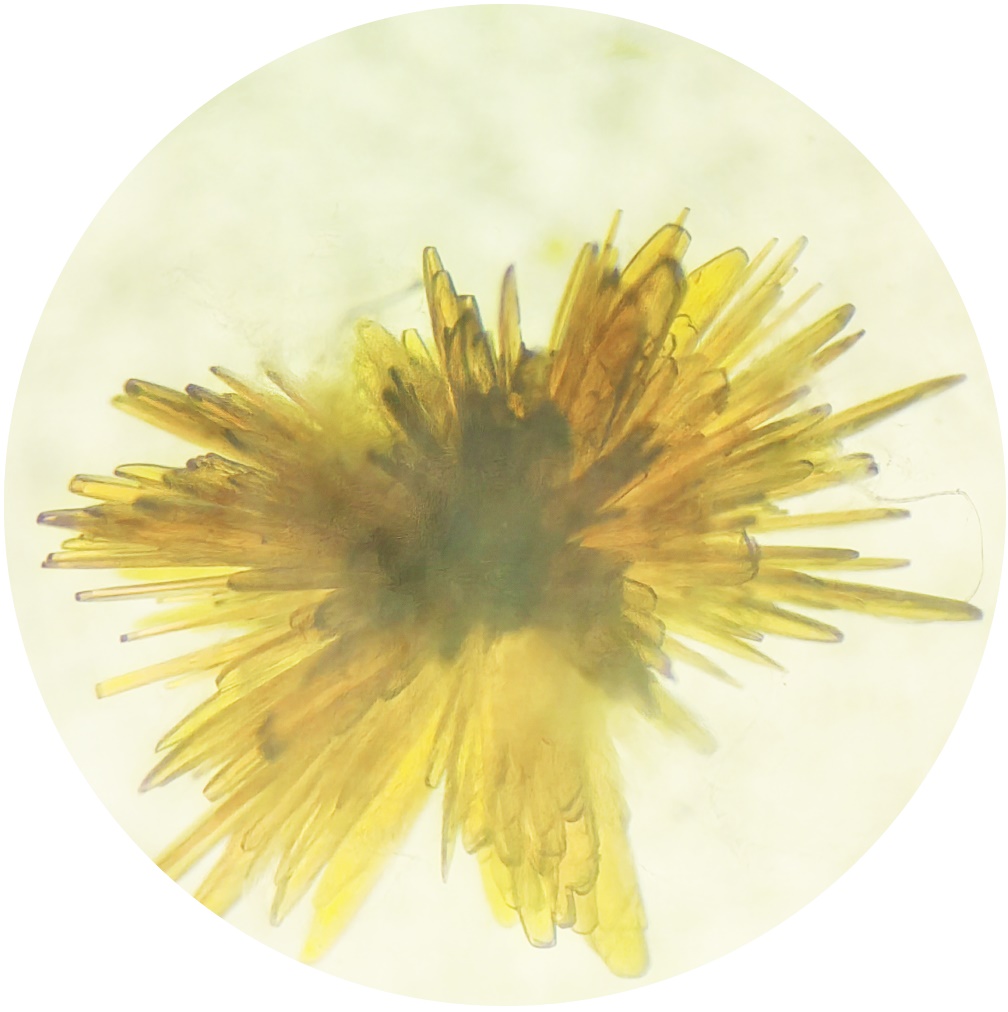


**Figure S2.** The flower-shaped crystal of GA-BBR NPs.

**Table S3.** Crystal data and structure refinement for GA-BBR NPs (CCDC: 2208520).

| Name | GA-BBR NPs |
| --- | --- |
| Chemical composition | C216H195N8O80 |
| Formula mass | 4182.79 |
| Crystal system | Monoclinic |
| Space group | P 21 |
| Unit cell dimensions | a=9.320 (2) Å  α=90 °  b=20.966 (6) Å  β=91.636 (9)°  c=47.181 (12)Å  γ=90 ° |
| Volume | 9216 (4) Å3 |
| Z | 2 |
| Density | 1.507 mg/m3 |
| Absorption coefficient | 0.116 mm-1 |
| F (000) | 4374 |
| Theta range for data collection | 1.939 to 22.473 ° |
| Index ranges | -10<=h<=10, -22<=k<=22, -50<=l<=50 |
| Refinement method | Full-matrix least-squares on F2 |
| Goodness-of-fit on F2 | 0.918 |

**

**

**Figure S3.** Bacteriostatic rates of GA, BBR, GA-BBR NPs and GA/BBR mixture at different concentrations *in vitro*. All dates were presented as the mean ± SD, *P < 0.05, ***P < 0.001 (n = 3).


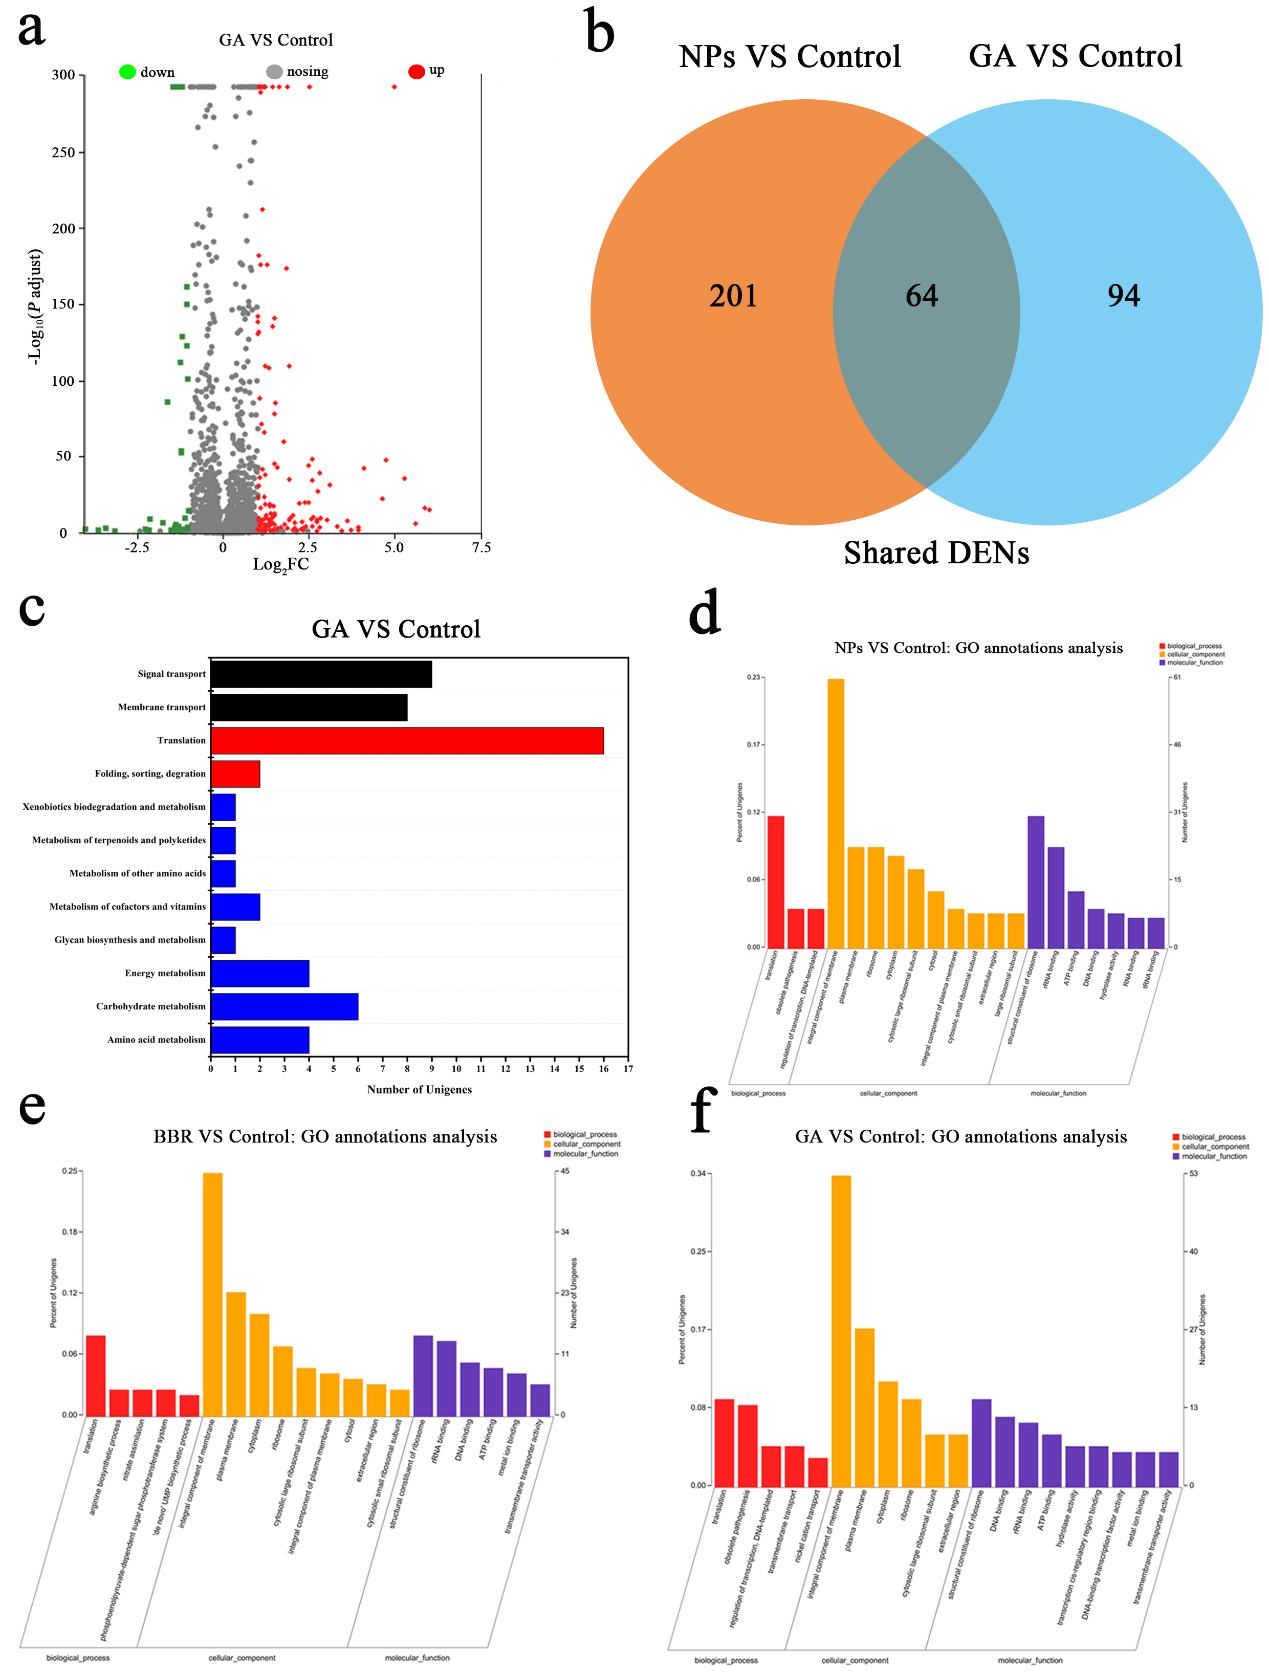


**Figure S4.** Antibacterial mechanism study. (a) GA VS Control differentially expressed genes (DEGs) in volcanic map. (b) Venn diagram of the DEGs in GA-BBR NPs and GA. (c) KEGG annotation statistics GA VS Control. (d) - (f) GO terms between GA-BBR NPs, BBR and GA.

**Table S4.** Gene Ontology analysis of GA-BBR NPs

| GO term | category | Number of Unigenes |
| --- | --- | --- |
| translation | biological process | 30 |
| obsolete pathogenesis | biological process | 9 |
| regulation of transcription | biological process | 9 |
| integral component of membrance | cellular component | 61 |
| plasma membrance | cellular component | 23 |
| ribosome | cellular component | 23 |
| cytoplasm | cellular component | 21 |
| cytosolic large ribosomal subunit | cellular component | 18 |
| cytosol | cellular component | 13 |
| integral component plasma membrane | cellular component | 9 |
| cytosolic small ribosomal subunit | cellular component | 8 |
| extracellular region | cellular component | 8 |
| large ribosomal subunit | cellular component | 8 |
| structural constituent of ribosome | molecular function | 30 |
| rRNA binging | molecular function | 23 |
| ATP binging | molecular function | 13 |
| DNA binging | molecular function | 9 |
| hydrolase activity | molecular function | 8 |
| RNA binging | molecular function | 7 |
| tRNA binging | molecular function | 7 |

**Table S5.** Gene Ontology analysis of BBR

| GO term | category | Number of Unigenes |
| --- | --- | --- |
| translation | biological process | 15 |
| arginine biosynthetic process | biological process | 5 |
| nitrate assimilation | biological process | 5 |
| phosphoenolpyruvate-dependent sugar phosphotransferase system | biological process | 5 |
| 'de novo' IMP biosynthetic process | biological process | 4 |
| integral component of membrance | cellular component | 45 |
| plasma membrance | cellular component | 23 |
| cytoplasm | cellular component | 19 |
| ribosome | cellular component | 13 |
| cytosolic large ribosomal subunit | cellular component | 9 |
| integral component plasma membrane | cellular component | 8 |
| cytosol | cellular component | 7 |
| extracellular region | cellular component | 6 |
| cytosolic small ribosomal subunit | cellular component | 5 |
| structural constituent of ribosome | molecular function | 15 |
| rRNA binging | molecular function | 14 |
| DNA binging | molecular function | 10 |
| ATP binging | molecular function | 9 |
| metal ion binging | molecular function | 8 |
| transmembrane transporter activity | molecular function | 6 |

**Table S6.** Gene Ontology analysis of GA

| GO term | category | Number of Unigenes |
| --- | --- | --- |
| translation | biological process | 15 |
| obsolete pathogenesis | biological process | 14 |
| negative regulation of transcription, DNA-templated | biological process | 7 |
| transmembrane transport | biological process | 7 |
| nickel cation transport | biological process | 4 |
| integral component of membrance | cellular component | 53 |
| plasma membrance | cellular component | 27 |
| cytoplasm | cellular component | 18 |
| ribosome | cellular component | 15 |
| cytosolic large ribosomal subunit | cellular component | 9 |
| extracellular region | cellular component | 9 |
| structural constituent of ribosome | molecular function | 15 |
| DNA binging | molecular function | 12 |
| rRNA binging | molecular function | 11 |
| ATP binging | molecular function | 9 |
| hydrolase activity | molecular function | 7 |
| transcription cis-regulatory region binding | molecular function | 7 |
| DNA-binding transcription factor activity | molecular function | 6 |
| metal ion binging | molecular function | 6 |
| transmembrane transporter activity | molecular function | 6 |


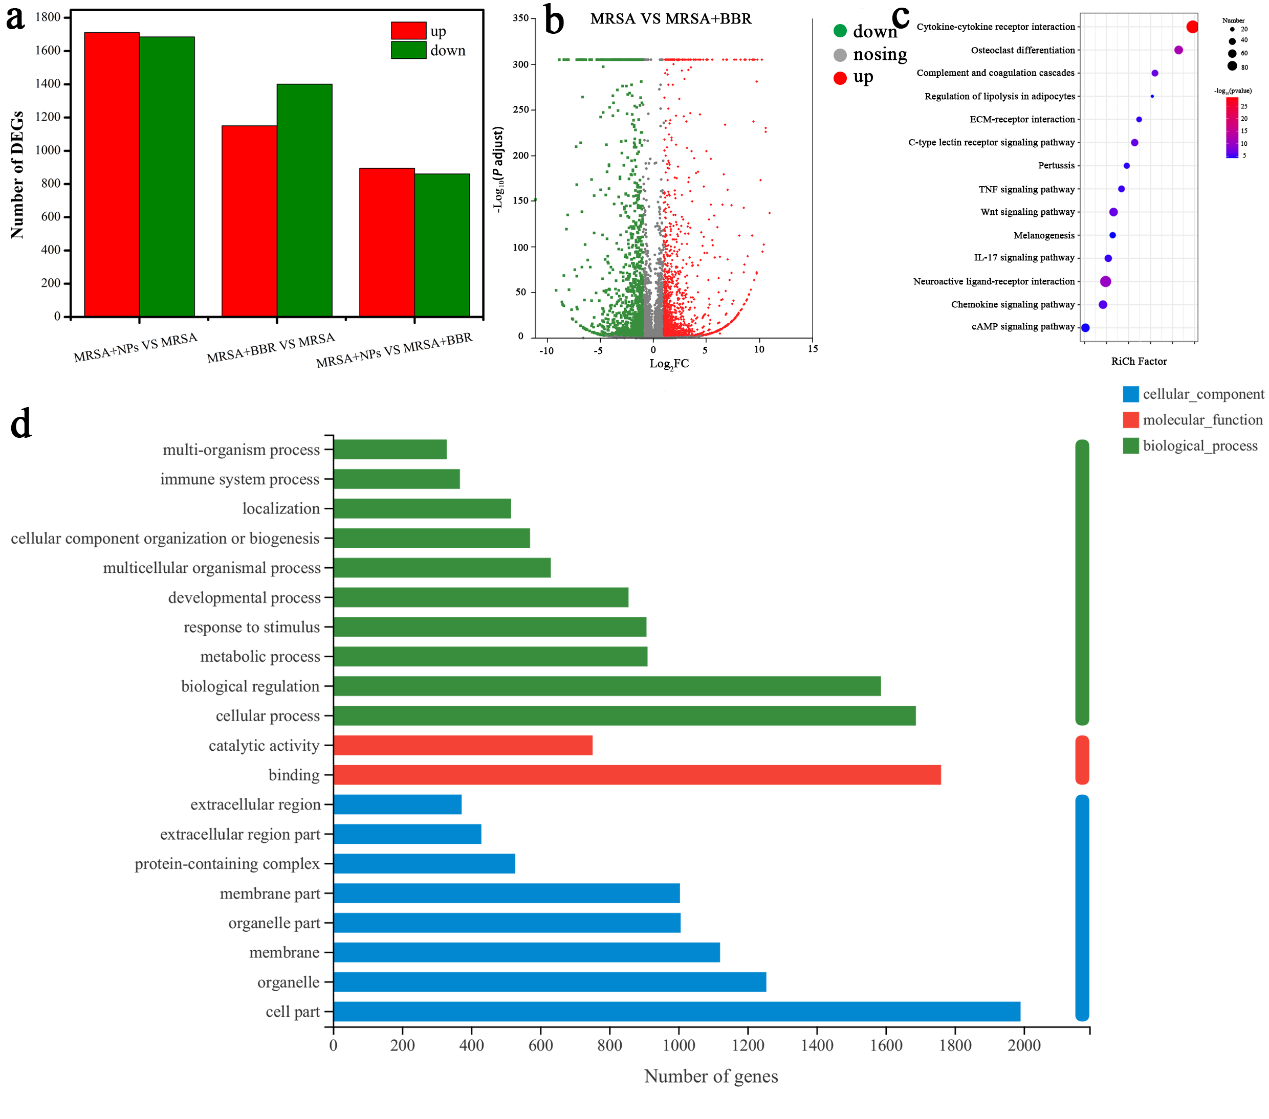


**Figure S5.** Transcriptional analysis. (a) Expression difference analysis statistics. (b) Volcano plot showing differentially expressed genes (DEGs). (c) KEGG enrichment analysis (d) GO annotation analysis.
